# Supplementary material for: Kinetic modelling and quantification bias in small animal PET studies with [18F]AB5186, a novel 18 kDa translocator protein radiotracer
Source: PLoS One. 2019 May 31;14(5):e0217515. doi: 10.1371/journal.pone.0217515 (PMC6544349; doi:10.1371/journal.pone.0217515)
Supplement: S1 Fig — A) Parent and radiometabolites of 18F-AB5186 at 2 hours post-radiotracer injection in the arterial blood. B) Parent peak of 18F-AB5186 at 2 hours post-radiotracer injection in the heart and C) brain. (DOCX) [file pone.0217515.s001.docx]

**SUPPLEMENTARY FILE**

**Kinetic modelling and quantification bias in small animal PET studies with 18F-AB5186, a novel 18 kDa translocator protein radiotracer**

Mark G. MacAskill1,2, Tashfeen Walton1,2, Lewis Williams3, Timaeus E. F. Morgan3, Carlos José Alcaide-Corral1,2, Marc R. Dweck1, Gillian A. Gray1, David E. Newby1, Christophe Lucatelli2, Andrew Sutherland3, Sally L. Pimlott4,5, Adriana A.S. Tavares1,2,*

1 University/ BHF Centre for Cardiovascular Science, University of Edinburgh, Edinburgh, UK.

2 Edinburgh Imaging, University of Edinburgh, Edinburgh, UK.

3 WestCHEM, School of Chemistry, University of Glasgow, UK.

4 School of Medicine, University of Glasgow, UK.

5 West of Scotland PET Centre, NHS Greater Glasgow and Clyde, UK.


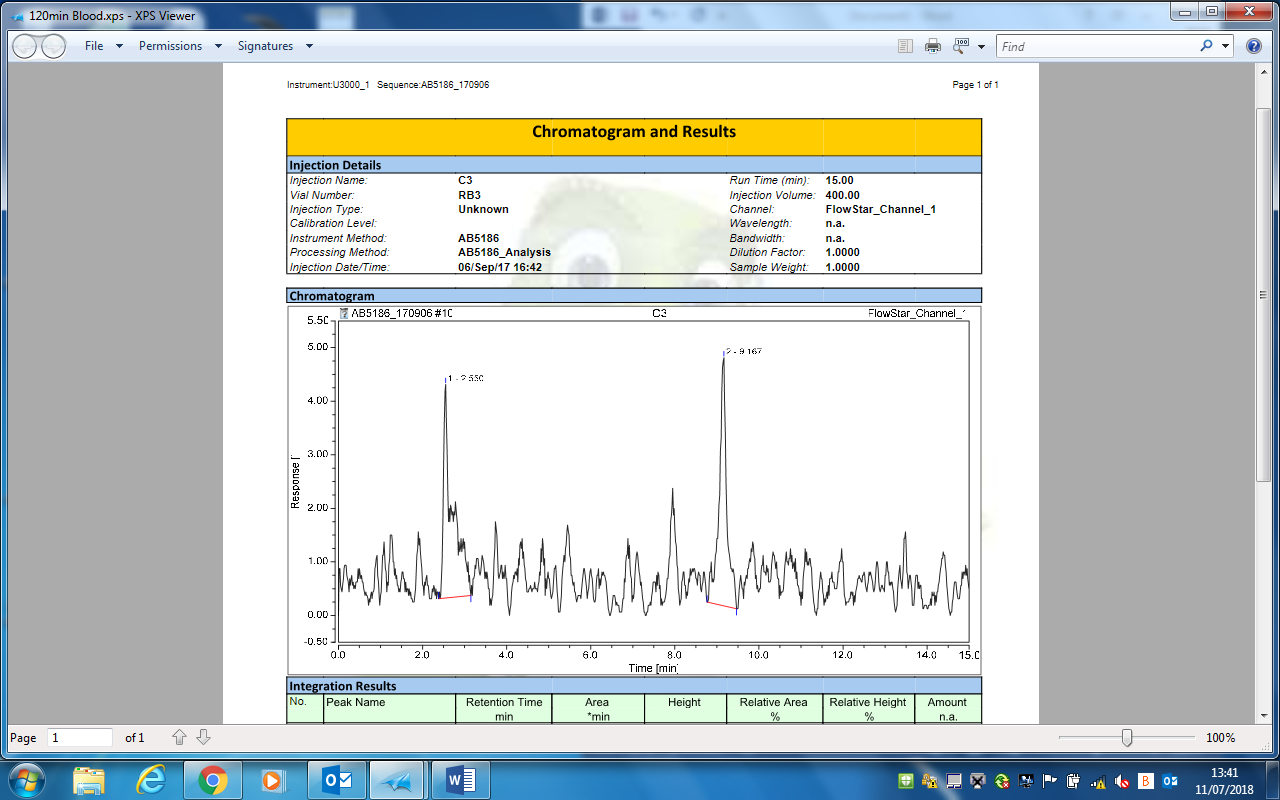

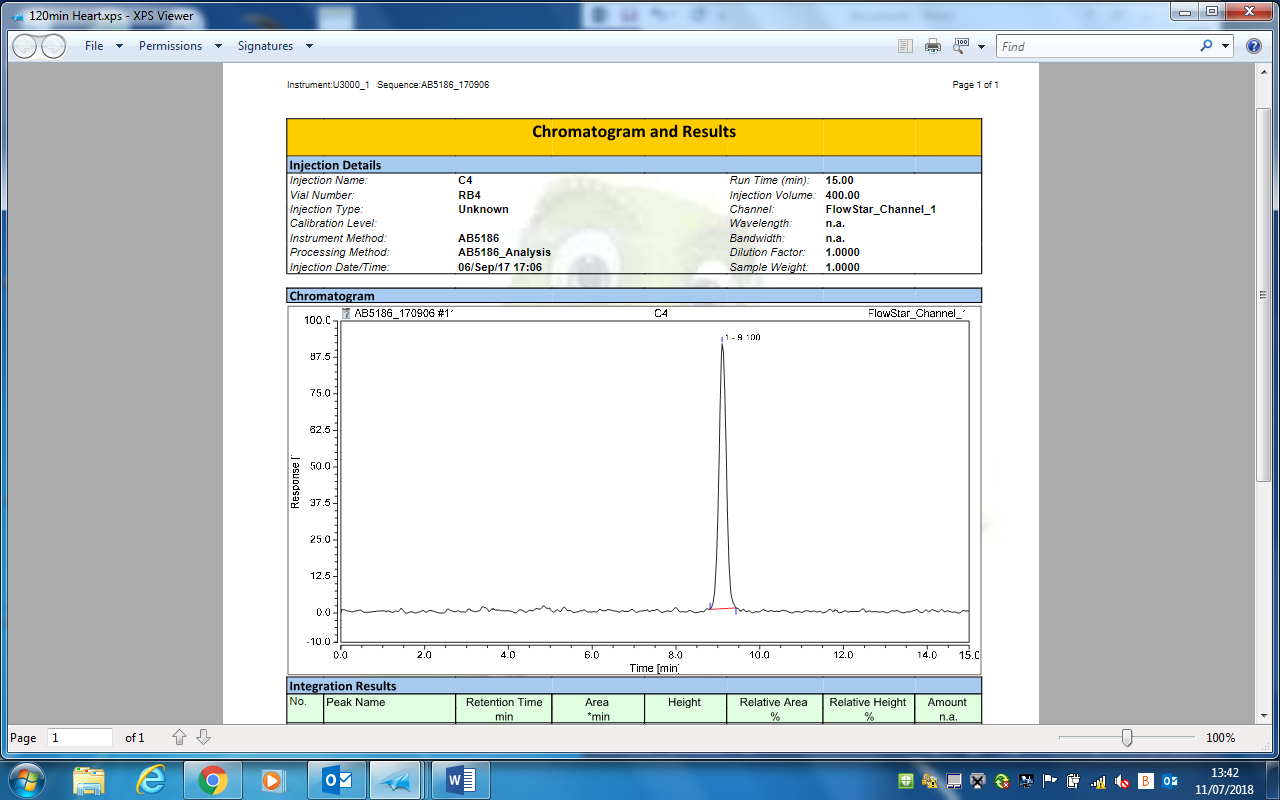

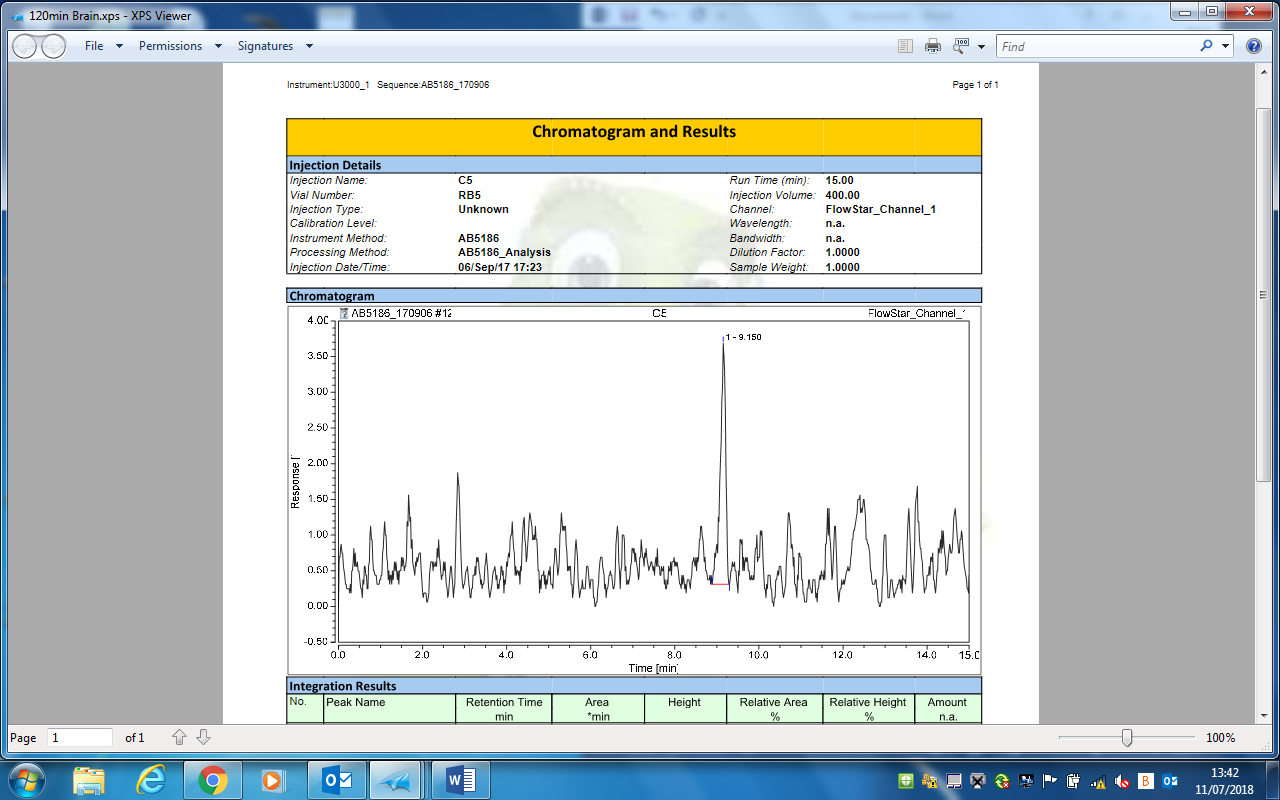


**A**

**B**

**C**

**S1 Fig. Representative radiochromatograms of 18F-AB5186 parent peak and radiometabolites.** **A)** Parent and radiometabolites of 18F-AB5186 at 2 hours post-radiotracer injection in the arterial blood. **B)** Parent peak of 18F-AB5186 at 2 hours post-radiotracer injection in the heart and **C)** brain.
